# Supplementary material
Source: Springer Nature journal article supplement (https://www.springermedizin.de/resource/supplementary/12891_2014_2170_MOESM6_ESM.pdf/9509558)
Supplement: MOESM6 [file 9509558]

20 Randomly selected high-schools

Two schools withdrew

18 Schools participated

994 Students screened for UQMP

Students excluded due to:

- UQMP symptoms (n=523)
- Inappropriate age (n=99)
- Repeating CAT (n=18)
- Language barrier (n=1)

353 Students invited to participate (receiving information and consent letters)

235 students provided written informed consent

24 students absent on day of testing

211 students participated

17 students had corrupted data due to a technical problem with the 3D-PAT

Data of 194 students reported
